# Supplementary material
Source: PubMed Central journal article supplement (PMC3406143)

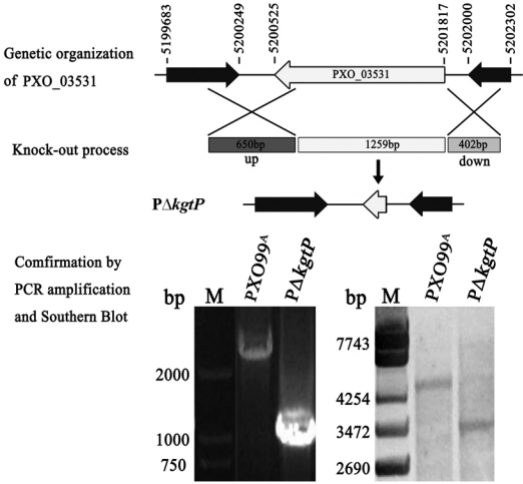

Supplement: AEM.07997-11_zam999103519so1.pdf [file AEM.07997-11_zam999103519so1.pdf]
